## RESEARCH ARTICLE

# Different fuel regulation in two types of myofiber results in different antioxidant strategies in Daurian ground squirrels (*Spermophilus dauricus*) during hibernation

Shen-Hui Xu<sup>1,\*</sup>, Wei-Wei Fu<sup>2,\*</sup>, Jie Zhang<sup>1</sup>, Hui-Ping Wang<sup>1</sup>, Kai Dang<sup>3</sup>, Hui Chang<sup>1</sup> and Yun-Fang Gao<sup>1,‡</sup>

## ABSTRACT

We previously showed that different skeletal muscles in Daurian ground squirrels (*Spermophilus dauricus*) possess different antioxidant strategies during hibernation; however, the reason for these varied strategies remains unclear. To clarify this issue, we studied REDD1, FOXO4, PGC-1 $\alpha$ , FOXO1 and atrogin-1 proteins to determine the potential cause of the different antioxidant strategies in Daurian ground squirrels during hibernation, and to clarify whether different strategies affect atrophy-related signals. Results showed that the soleus (SOL) muscle experienced intracellular hypoxia during interbout arousal, but no oxidative stress. This may be due to increased PGC-1 $\alpha$  expression enhancing antioxidant capacity in the SOL under hypoxic conditions. Extensor digitorum longus (EDL) muscle showed no change in oxidative stress, hypoxia or antioxidant capacity during hibernation. The FOXO1 and PGC-1 $\alpha$  results strongly suggested differentially regulated fuel metabolism in the SOL and EDL muscles during hibernation, i.e. enhanced lipid oxidation and maintained anaerobic glycolysis, respectively. Atrogin-1 expression did not increase during hibernation in either the SOL or EDL, indicating that protein synthesis was not inhibited by atrogin-1. Thus, our results suggest that different fuel regulation may be one mechanism related to antioxidant defense strategy formation in different kinds of skeletal muscle fibers of Daurian ground squirrels during hibernation.

**KEY WORDS:** Hibernation, Skeletal muscle, Fuel regulation, Antioxidant defense strategy, Ground squirrels

## INTRODUCTION

Unlike non-hibernators under muscle disuse conditions, hibernators experience little atrophy in their skeletal muscles despite months of inactivity (Gao et al., 2012; Hershey et al., 2008; Lohuis et al., 2007). For example, after long-term inactivity during hibernation, small mammal hibernators exhibit only 13% to 33% hindlimb skeletal muscle atrophy (Nowell et al., 2011; Rourke et al., 2004; Steffen et al., 1991). In addition, ischemia–reperfusion following long-term disuse can cause oxidative stress in non-hibernators; in contrast, ischemia–reperfusion can also occur in hibernators during

interbout arousal, but without induced oxidative stress. As such, hibernators can be regarded as a natural model of resistance to disuse atrophy and oxidative stress (Chazarin et al., 2019; Ma et al., 2005).

Reactive oxygen species (ROS) are produced in different cellular organs where oxygen consumption is high, including in peroxisomes, endoplasmic reticulum and, particularly, mitochondria (Phaniendra et al., 2015). Under hypoxia or other conditions such as disuse and ischemia–reperfusion, mitochondria produce excessive ROS, which cannot be adequately dealt with by the antioxidative defense system. This, in turn, induces oxidative stress, resulting in an imbalance in protein homeostasis and, finally, muscle atrophy. Many researchers propose that oxidative stress-induced imbalance of protein homeostasis is the main reason leading to disuse atrophy (Gao et al., 2018; Powers et al., 2012).

During hibernation, hibernators transfer fuel from carbohydrates to stored fat in order to survive cold winters with limited food supply. This transformation is accomplished through the high expression of pyruvate dehydrogenase kinase isoenzyme 4 (PDK4) in heart, skeletal muscle and white adipose tissue (WAT), which suppresses pyruvate dehydrogenase activity and increases the consumption of fat in those tissues (Buck et al., 2002).

Our research group previously showed that malondialdehyde content, an indicator of lipid oxidative stress, is significantly lower in extensor digitorum longus (EDL) muscles than in soleus (SOL) muscle; furthermore, differential expression in essential antioxidant protein Nrf-2 occurs in different skeletal muscles (Wei et al., 2019). This suggests that energy metabolism may be involved in different antioxidant defense strategies in different types of skeletal muscle in Daurian ground squirrels (*Spermophilus dauricus* Brandt 1843) during hibernation.

Thus, in the present study, we selected SOL (representative of oxidative myofiber) and EDL (representative of glycolytic myofiber) muscles to study the relationship between energy metabolism and antioxidant defense strategies in different types of myofiber. This was achieved by analyzing oxygen supply, oxidative stress response, antioxidant defense capacity and energy metabolism regulation based on the expression levels of the REDD1, FOXO4, PGC1 and FOXO1 proteins. The REDD1 (also known as RTP801) promoter contains a hypoxia response element, which reacts quickly to and is an indicator of intracellular hypoxia (Adams et al., 2009; Canal et al., 2014; Ono et al., 2017; Shoshani et al., 2002). The FOXO4 transcription factor can function as an indicator of oxidative stress in myofibers under different oxygen conditions (Essers et al., 2004). The expression of PGC-1 $\alpha$ , which mainly exists in high-energy demanding tissues with abundant mitochondria, can reflect the antioxidant defense capacity of tissues (Austin and St-Pierre, 2012; Xu et al., 2013). Furthermore, PGC-1 $\alpha$  and FOXO1, which are upstream transcription factors of PDK4, can

<sup>1</sup>Shaanxi Key Laboratory for Animal Conservation, Northwest University, Xi'an Shaanxi 710069, China. <sup>2</sup>Shaanxi Key Laboratory for Animal Conservation, Shaanxi Institute of Zoology, Xi'an Shaanxi 710032, China. <sup>3</sup>Laboratory for Bone Metabolism, Key Laboratory for Space Bioscience and Biotechnology, School of Life Sciences, Northwestern Polytechnical University, Xi'an Shaanxi 710072, China. \*These authors contributed equally to this work

<sup>‡</sup>Author for correspondence (gaoyunf@nwu.edu.cn)

 S.-H.X., 0000-0002-2616-5132; W.-W.F., 0000-0001-8042-7722; Y.-F.G., 0000-0002-9590-6715

enhance lipid oxidation in the cell (Buck et al., 2002; Connaughton et al., 2010). We also detected the expression of atrogin-1 to study whether energy metabolism in different myofibers affects protein synthesis during hibernation.

## MATERIALS AND METHODS

### Animal treatment

All animal experiments were approved by the Laboratory Animal Care Committee of the China Ministry of Health, and this study was reviewed and approved by the Northwest University Ethics Committee.

Daurian ground squirrels were captured in mid-August from the Wei Nan region, Shaanxi Province, China. The squirrels were kept in cages maintained at 18–25°C and provided with food and water *ad libitum* until they entered hibernation and finished the pre-hibernation phase (mid-September). After this, they were transferred to a hibernaculum (5–8°C) to facilitate entry into torpor (Gao et al., 2012; Yang et al., 2014). Body temperature ( $T_b$ ) was measured based on thermal imaging twice daily using a visual thermometer (Fluke VT04 Visual IR Thermometer, Fluke, Everett, WA, USA) throughout hibernation. The different experimental groups were as follows (Table 1): (i) pre-hibernation group (PRE): animals maintained a stable  $T_b$  of 36–38°C in mid-September; (ii) hibernation group (HIB): animals established regular torpor bouts lasting longer than 2 months and entered into a new torpor bout with  $T_b$  maintained at 5–8°C for 5 days; (iii) interbout arousal group (IBA): animals hibernated for 2 months and fully aroused from torpor with a  $T_b$  of 36–38°C for ~12 h; and (iv) post-hibernation group (POST): animals awoke from hibernation and maintained a  $T_b$  of 36–38°C for more than 3 days in March (spring) of the following year. The squirrels were weight-matched and randomly allocated into one of four groups ( $n=8$  in each group). All animals were anesthetized with urethane and killed by cervical dislocation. Hindlimb skeletal muscle samples, including slow-twitch SOL and fast-twitch EDL, were immediately collected, dissected and weighed to determine wet muscle mass. The hindlimb skeletal muscle samples were frozen in liquid nitrogen and stored at –80°C until later use.

### Total protein extraction and western blot analysis

Total soluble protein extracts from frozen skeletal muscle samples from three to six animals in each stage of hibernation (PRE, HIB, IBA and POST) were prepared as described previously (Yang et al., 2014). In brief, frozen tissue samples (~0.1 g) were homogenized with RIPA lysis buffer and 10  $\mu$ l ml<sup>-1</sup> protease inhibitor cocktail (both from Heart, China). Samples were centrifuged at 4°C for 15 min at 15,172 g to obtain the supernatant. Soluble protein concentration was determined using a Pierce™ BCA protein quantification kit (Thermo Fisher Scientific, USA). The samples were then adjusted to a final protein concentration of 2.5  $\mu$ g  $\mu$ l<sup>-1</sup> with 1× SDS loading buffer

(Booster, China) and homogenizing buffer. The final protein samples were stored at –80°C until further use.

Equal amounts of protein from each sample (7  $\mu$ l) were loaded onto 10% (molecular weight more than 25 kDa and less than 200 kDa) and 15% (molecular weight less than 25 kDa) polyacrylamide gels containing 0.5% trichloroethanol (TCE), with electrophoresis run at 120 V for 60–100 min (Ladner et al., 2004). Fluorescence images of gels were captured using a G:BOX XR5 Bioimaging system (Syngene, Cambridge, UK) to normalize protein loading irregularities and analyze total protein expression. Proteins in the gel were then transferred to polyvinylidene fluoride membranes (0.20  $\mu$ m pore size, Roche, Germany) using a Bio-Rad tank transfer apparatus with electroblotting at 40 V for 30 min in heated transfer buffer (>70°C) containing 25 mmol l<sup>-1</sup> Tris and 192 mmol l<sup>-1</sup> glycine (Kurien and Scofield, 2015). Membranes were then blocked with 4% Mowiol® PVA-203 (Aladdin, China) in Tris-buffered saline (TBS) for 10 min (Gholap et al., 2005; Rodda and Yamazaki, 1994), and incubated with REDD1 (Proteintech, 10638-1-AP), atrogin-1 (Proteintech, 12866-1-AP), PGC-1 $\alpha$  (Novus, NBP1-04676SS), FOXO1 (C29H4) rabbit mAb (CST#2880), phospho-FOXO1 (Ser256) antibody (CST#9461), FOXO4 (CST#9472) and FOXO4 (phospho-Thr451) (Signalway antibody, 12053) in 0.1% TBST (TBS with 0.1% Tween 20) containing 2% polyvinylpyrrolidone (PVP-40; Amresco, USA, 0507-500G) at 4°C overnight. Membranes were washed and subsequently incubated with horseradish peroxidase (HRP)-linked anti-rabbit IgG secondary antibody (1:3000 to 1:10,000 v:v dilution, depending on targets, Thermo Fisher Scientific, A27014) in TBST for 2 h at room temperature. After again washing with TBST (4×5 min), the membranes were incubated with chemiluminescence solutions (Thermo Fisher Scientific, cat. no. 34080) and bands were detected using the G:BOX XR5 Bioimaging system.

The fold-change of every target protein relative to pre-hibernation levels was calculated. Immunoblot band density in each lane was standardized against the summed intensity of total protein. The enhanced chemiluminescence (ECL) band intensities were analyzed using GeneTools (v4.3.7.0). The sum of a group of stably expressed proteins in the TCE-containing gel was analyzed using Image-Pro Plus 6.0 (Media Cybernetics, Inc., Rockville, MD, USA). The ECL bands were standardized against a group of stably expressed proteins within the same lane in the TCE-containing gels to control against irregularities in protein loading (Gilda and Gomes, 2013; Gurtler et al., 2013; Ladner et al., 2004; Vigelsø et al., 2015). Total protein normalization is more effective than using a single housekeeping gene in natural model systems (Wijenayake et al., 2017). For time-course western blot quantification, not all protein homogenates could be run on the same gel owing to lane limitations, so one of the samples (e.g. PRE1) was run on each gel, and the band densities of the other samples were standardized to the same sample (e.g. PRE1 on all blots).

### Data and statistical analysis

Data are presented as means±s.e.m. normalized to the PRE group mean. Statistical analysis was performed using one-way ANOVA followed by a Tukey's *post hoc* test ( $P<0.05$ ) using SPSS Statistics v19 (IBM, Armonk, NY, USA). Outlier testing was also conducted using SPSS Statistics v19. All figures were constructed using GraphPad Prism software (San Diego, CA, USA).

## RESULTS

### REDD1 expression

REDD1 is located downstream of HIF-1 and responds quickly to hypoxia (Shoshani et al., 2002). As shown in Fig. 1, REDD1

**Table 1. Details of the different experimental groups used in the present study**

| State | Sample time                                                           | $T_b$ of animals             |
|-------|-----------------------------------------------------------------------|------------------------------|
| PRE   | Mid-September                                                         | 36–38°C                      |
| HIB   | After 2 months of hibernation, animals entered a new hibernation bout | Stable 5–8°C for 5 days      |
| IBA   | Same as HIB                                                           | 36–38°C for ~12 h            |
| POST  | March of following year                                               | 36–38°C for more than 3 days |

$T_b$ , body temperature; PRE, pre-hibernation group; HIB, hibernation group; IBA, interbout arousal group; POST, post-hibernation group.

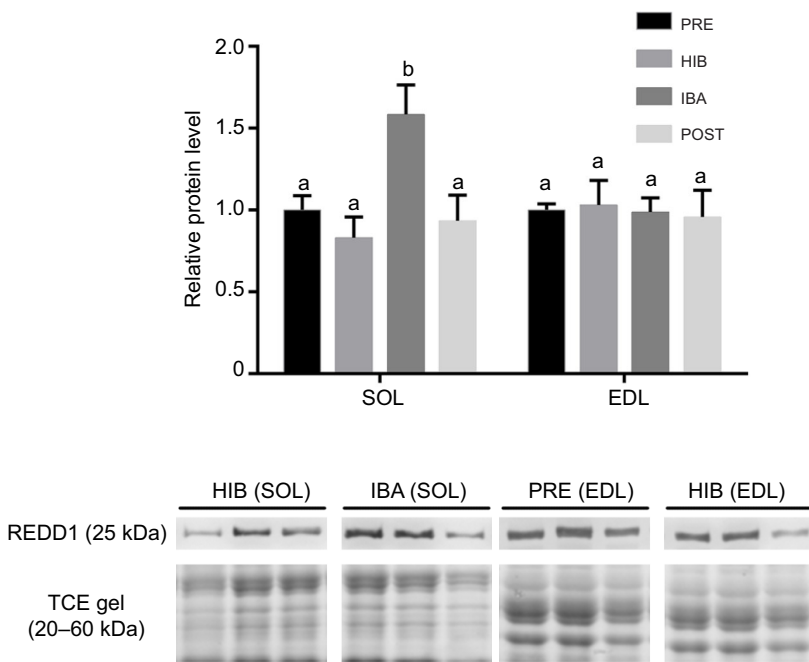

**Fig. 1. Expression of REDD1 in SOL and EDL muscles of Daurian ground squirrels during hibernation.** Protein expression levels were visualized at four sampling points: pre-hibernation (PRE), hibernation (HIB), interbout arousal (IBA) and post-hibernation (POST). See Materials and Methods for more extensive definitions. Representative immunoblots and Stain-Free total protein loading controls are shown below for selected pairs of sampling points and muscles that are labeled on the top of the blot. Data were analyzed using an ANOVA with a *post hoc* Tukey's test ( $P < 0.05$ ); values that are not statistically different from each other share the same letter notation.

expression in the SOL muscle increased significantly by 1.58-fold in the IBA group compared with the PRE group ( $P < 0.05$ ). In contrast, REDD1 expression in the EDL muscle showed no significant change.

**FOXO expression and phosphorylated level**

As shown in Fig. 2, in the EDL muscle, total protein expression and phosphorylation of FOXO4 remained stable during hibernation; in the SOL muscle, however, the phosphorylated level of FOXO4 was reduced by 63.2% ( $P < 0.05$ ) in the IBA group compared with that in the PRE group. In the EDL muscle, total protein expression of FOXO1 remained stable during hibernation (Fig. 3), whereas its phosphorylated level decreased significantly by 77.4% ( $P < 0.01$ ) and 72.4% ( $P < 0.05$ ) in the POST group compared with that in the

HIB and IBA groups, respectively. In the SOL muscle, total expression and phosphorylation of FOXO1 increased 1.72-fold ( $P < 0.01$ ) and 1.91-fold ( $P < 0.05$ ), respectively, in the HIB group compared with that in the PRE group.

**PGC-1 $\alpha$  expression**

As seen in Fig. 4, PGC-1 $\alpha$  protein expression in the SOL muscle showed a significant 1.57-fold increase ( $P < 0.01$ ) in the HIB group compared with that in the PRE group. In the EDL muscle, however, no significant changes were observed in any group.

**Atrogin-1 expression**

We detected atrogin-1 expression in the EDL and SOL muscles. As shown in Fig. 5, there was no change in atrogin-1 protein expression

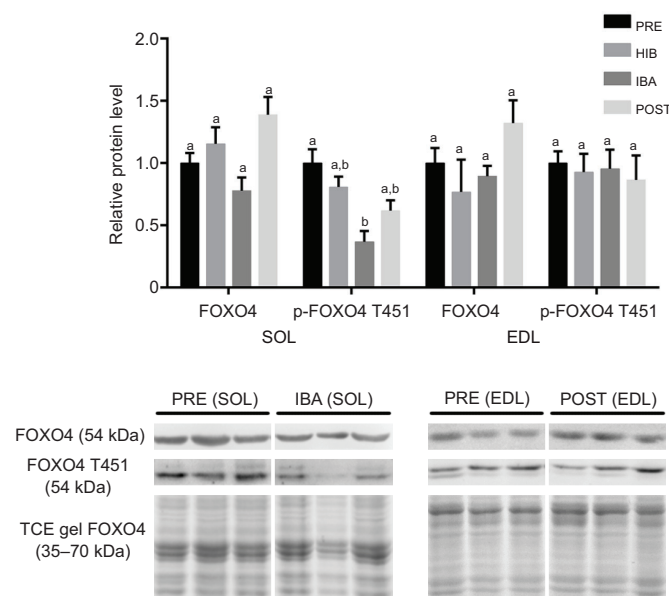

**Fig. 2. FOXO4 expression and phosphorylation in skeletal muscles of Daurian ground squirrels during hibernation.** Other information as in Fig. 1.

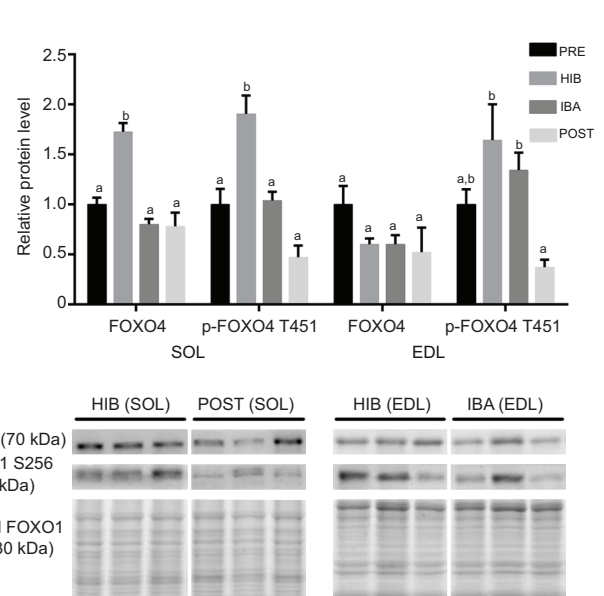

**Fig. 3. FOXO1 expression and phosphorylation in skeletal muscles of Daurian ground squirrels during hibernation.** Other information as in Fig. 1.

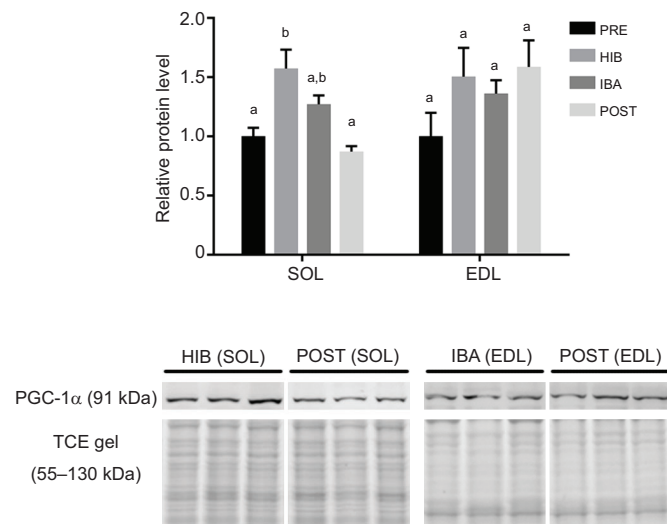

**Fig. 4. PGC-1 $\alpha$  expression in different muscles of Daurian ground squirrels during hibernation.** Other information as in Fig. 1.

in the SOL muscle; in the EDL muscle, however, expression showed a significant 42.3% decrease ( $P < 0.01$ ) in the HIB group compared with that in the PRE group.

## DISCUSSION

Skeletal muscles of hibernators face challenges from disuse, fasting, hypoxia and ischemia–reperfusion during the hibernation period. These challenges can increase the risk of oxidative stress to skeletal muscle. For example, in non-hibernators under disuse conditions, oxidative stress can lead to muscle atrophy (Moyle and Reid, 2007; Powers et al., 2012). Hibernators survive cold winter conditions by switching fuel to fat reserves stored during pre-hibernation. A high-fat diet and long-chain fatty acid oxidation can induce oxidative stress in non-hibernator skeletal muscles (Seifert et al., 2010; Yuzefovych et al., 2013). Thus, when studying the mechanism of resistance to muscle atrophy in hibernators, researchers should consider not only the multiple stresses of hibernation, but also the potential effects of different energy metabolism on different myofibers. Here, we

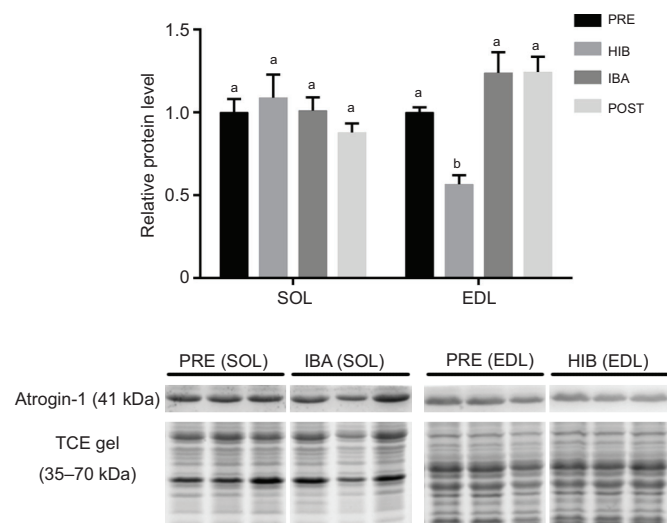

**Fig. 5. Atrogin-1 expression in different muscles of Daurian ground squirrels during hibernation.** Other information as in Fig. 1.

selected SOL and EDL muscles as representatives of oxidative and glycolytic myofibers, respectively, in order to analyze the relationship between oxidative stress, antioxidant strategies and metabolic regulation in different myofibers. Our results indicated differentiated metabolic regulation in different myofibers of hibernating Daurian ground squirrels, which may be the reason for the different antioxidant strategies in different skeletal muscles.

REDD1 (also known as RTP801) is a downstream transcription factor of hypoxia marker HIF-1 and is upregulated under a variety of stress conditions (Shoshani et al., 2002). The REDD1 promoter contains a hypoxia response element, which responds to and is an indicator of intracellular hypoxia (Adams et al., 2009; Canal et al., 2014; Shoshani et al., 2002). In addition, the REDD1 promoter can be used as a sensor in hypoxia-responsive transgene expression systems (Ono et al., 2017). Our results showed that REDD1 expression in the SOL was increased in the IBA group compared with the PRE group; in contrast, no change occurred in the EDL muscle. This indicates that SOL myofibers experience intracellular hypoxia during IBA, but that oxygen supply has no effect on the EDL. This difference may be due to the different oxidative capacity of the two skeletal muscles. Our previous study showed that myoglobin (Mb) content is increased in the SOL (by 1.31-fold) during hibernation, but shows no change in the EDL, indicating that the oxidative capacity of the SOL increases during hibernation (Jiang et al., 2015). This increase in oxidative capacity may lead to increased oxygen consumption in the SOL during IBA, as well as low  $S_{pO_2}$  (peripheral oxygen saturation) (Zhang et al., 2019). These two factors may thus induce intracellular hypoxia, resulting in the upregulation of REDD1.

To clarify whether the different respiration-type myofibers experienced oxidative stress under different oxygen conditions, we analyzed FOXO4, a transcription factor that responds to oxidative stress (Essers et al., 2004). FOXO4 is a member of the FOXO subfamily, which plays a role in anti-oxidative stress, proteostasis, cell cycle, autophagy and cellular metabolism (Canal et al., 2014; Ferdous et al., 2010; McLaughlin and Broihier, 2018). Phosphorylated FOXO4 (Thr451), which is located in the nucleus, functions in oxidative stress response and transcription of antioxidants such as MnSOD and catalase to reduce intracellular ROS (Eijkelenboom and Burgering, 2013; Essers et al., 2004). Thus, the phosphorylation of FOXO4 in the Thr-451 site can reflect intracellular oxidative stress levels (Eijkelenboom and Burgering, 2013; Essers et al., 2004). Our results indicated that total expression of FOXO4 showed no change in the SOL, but p-FOXO4 (Thr451) decreased by 63.2% ( $P < 0.05$ ) in the IBA group compared with that in the PRE group, suggesting that oxidative stress in the SOL decreased significantly under IBA conditions, opposite to the increase observed in REDD1. This conflict implies that the SOL experienced hypoxia during IBA, but that oxidative stress levels were lower than that in the PRE group. In the EDL muscle, no changes in REDD1 and FOXO4 were observed, indicating that oxygen supply and oxidative stress did not cause significant fluctuations during hibernation. Based on this paradox between hypoxia and low oxidative stress, we detected the expression of PGC-1 $\alpha$ , a critical factor in antioxidant defense (Austin and St-Pierre, 2012).

PGC-1 $\alpha$  mainly exists in high-energy demanding tissues with abundant mitochondria, such as skeletal muscle, brown adipose tissue, heart, liver and kidney. It functions in ROS detoxification and mitochondrial biogenesis, and its expression level can reflect the antioxidant defense capacity of tissue (Austin and St-Pierre, 2012; Xu et al., 2013). Here, our results showed that expression of

PGC-1 $\alpha$  in the SOL increased by 1.57-fold ( $P < 0.01$ ) in the HIB group but was unchanged in the EDL. The increase in PGC-1 $\alpha$  expression in the SOL implies an increase in antioxidant capacity, which could promote mitochondrial biogenesis. Coupled with our previous studies (Jiang et al., 2015; Wang et al., 2019), this suggests that the number of mitochondria and oxidative capacity increased in the SOL during hibernation. Wei et al. (2019) showed that Nrf-2 protein expression increases in Daurian ground squirrels during late torpor (same as HIB in the present study). Baldelli et al. (2013) also showed that PGC-1 $\alpha$  can activate the Nrf-2/Keap1 signaling pathway and increase the expression of antioxidants. Thus, we speculate that the coexistence of intracellular hypoxia and low oxidative stress may be related to the increased expression of PGC-1 $\alpha$  before arousal, which enhanced the antioxidant defense capacity of the SOL during IBA and allowed the muscle to limit oxidative damage under intracellular hypoxia.

Different from that in the SOL, the expression of PGC-1 $\alpha$  remained stable in the EDL. This suggests that the EDL, which is primarily composed of glycolytic myofibers (Ma et al., 2019), enhanced glycolytic capacity and activity of lactate dehydrogenase (Jiang et al., 2015) and maintained anaerobic respiration under a fat fuel source, which thus prevented ROS production (Mullarky and Cantley, 2015), as reported under  $S_{pO_2}$  conditions during IBA (Zhang et al., 2019). Therefore, the EDL does not need an increased antioxidant defense capacity. Previous work also reported stable Nrf-2 expression in the EDL during hibernation (Wei et al., 2019), corresponding to the stable REDD1 expression and FOXO4 phosphorylation observed in the present study in the EDL during hibernation. This indicates that the EDL does not experience intracellular hypoxia and maintains redox homeostasis.

PGC-1 $\alpha$  is an upstream transcription factor of PDK4, which is a crucial regulator of fuel metabolism in skeletal muscle (Connaughton et al., 2010). FOXO1 is also an upstream transcription factor of PDK4, and recruits PGC-1 $\alpha$  to the PDK4 promoter to enhance lipid oxidation in the cell (Connaughton et al., 2010; Furuyama et al., 2003; Kwon et al., 2004). To study the regulation of PDK4, we detected the expression of FOXO1 (as well as PGC-1 $\alpha$ ) to determine the effects of fuel regulation on oxidative stress in different myofibers. PDK4 is a mitochondrial protein that suppresses pyruvate dehydrogenase activity and increases fat consumption in the heart and skeletal muscle (Buck et al., 2002; Connaughton et al., 2010; Crewe et al., 2017). Different from phosphorylated FOXO4, which is located in the nucleus and exhibits transcriptional activity, phosphorylated FOXO1 (Ser-256) is located in the cytoplasm and shows no transcriptional activity, and therefore does not increase PDK4 transcription (Furuyama et al., 2003). In the present study, FOXO1 phosphorylation showed a 1.91-fold increase in the SOL in the HIB group compared with the PRE group. However, total FOXO1 expression increased by 1.72-fold during hibernation, indicating that non-phosphorylated FOXO1 also increased. Thus, these results suggest that the SOL increased PDK4 expression by regulating FOXO1 and PGC1 transcriptional activity to enhance oxidation capacity and lipid consumption. These findings are consistent with the upregulation of PDK4 and enhanced lipid oxidation capacity found in the quadriceps femoris muscles of thirteen-lined ground squirrels (*Ictidomys tridecemlineatus*) during hibernation (Buck and Barnes, 2000; Buck et al., 2002).

In the EDL muscle, total protein expression of FOXO1 showed no significant change in any group. However, the phosphorylated level of FOXO1 in the HIB and IBA groups was higher than that in the POST group, indicating that the transcriptional activity of

FOXO1 was inhibited during hibernation. Combined with the PGC-1 $\alpha$  results, these findings indicate that the activities of the two upstream factors of PDK4 were inhibited or remained stable during hibernation; these results correspond with our previous findings, which showed decreased PDK4 expression during hibernation (Chang et al., 2018). Following Jiang et al. (2015), who reported increased lactate dehydrogenase activity in the EDL during hibernation, we speculate that maintained anaerobic glycolysis respiration may prevent oxidative stress in the EDL (Mullarky and Cantley, 2015).

E3 ubiquitin ligase atrogin-1 inhibits protein synthesis by ubiquitination of eif-3f, and enhanced transcriptional activity of FOXO can increase the expression of atrogin-1 (Foletta et al., 2011; Moylan et al., 2008; Mullarky and Cantley, 2015; Pomiès et al., 2016). Research on non-hibernators has shown that atrogin-1 expression and transcription both increase in many atrophy models (Bodine et al., 2001; Gao et al., 2018; Lagirand-Cantaloube et al., 2008). As shown in Fig. 5, atrogin-1 expression in the SOL exhibited no change, indicating that protein synthesis suppression by atrogin-1 did not change during hibernation in the SOL. In the EDL, however, atrogin-1 expression decreased by 42.3% in the HIB group compared with that in the PRE group, indicating that protein synthesis suppression by atrogin-1 decreased under HIB conditions. In SOL, total protein expression and phosphorylation of FOXO1 increased by 1.72-fold and 1.91-fold in the HIB group, respectively. Although the abundance of active FOXO1 increased, the transcriptional level of atrogin-1 remained stable, indicating that other factors inhibited the transcription of atrogin-1. In the EDL, the inhibition of FOXO1 transcriptional activity under HIB and IBA conditions may be the reason for the decrease in atrogin-1 expression in the HIB group. In conclusion, protein synthesis in different skeletal muscles was not suppressed by atrogin-1.

## Conclusions

Hibernators experience long-term inactivity combined with hypoxia and ischemia–reperfusion during hibernation; despite this, their skeletal muscle does not exhibit atrophy, unlike that seen in non-hibernators under disuse and stressful environments. This study showed that oxidative skeletal muscle (SOL) experienced intracellular hypoxia during IBA but prevented oxidative stress by pre-enhancement of its antioxidant defense capacity, resulting in lower oxidative stress than that detected in the PRE group and preparation of oxidative stress strategies. Unlike oxidative skeletal muscle, typical glycolytic skeletal muscle (EDL) did not show intracellular hypoxia during hibernation and demonstrated no change in oxidative stress or antioxidant defense capacity. Thus, we reasoned that, under the condition of fuel change from carbohydrates to fat, glycolytic myofibers inhibited FOXO1 transcriptional activity, decreased PDK4 expression and maintained anaerobic glycolysis, which prevented aerobic respiration-induced ROS production and limited oxidative damage. Our results indicate that different myofibers in hibernating Daurian ground squirrels have developed different antioxidant defense strategies adapted to their respiration model. Furthermore, atrogin-1 expression was not increased in the different myofibers, indicating that both antioxidant strategies maintained redox homeostasis, and thus prevented oxidative stress-induced skeletal muscle atrophy.

## Competing interests

The authors declare that this research was conducted in the absence of any commercial or financial relationships that could be construed as a potential conflict of interest.

## Author contributions

Conceptualization: S.X., W.F., H.W., Y.G.; Methodology: S.X.; Software: S.X.; Validation: S.X., W.F.; Formal analysis: S.X.; Investigation: S.X., W.F.; Resources: S.X., W.F.; Data curation: S.X., J.Z.; Writing - original draft: S.X.; Writing - review & editing: W.F., J.Z., H.W., K.D., H.C., Y.G.; Visualization: H.C.; Supervision: J.Z., H.W., K.D., Y.G.; Project administration: Y.G.; Funding acquisition: H.W., K.D., H.C., Y.G.

## Funding

This work was supported by funds from the National Natural Science Foundation of China (no. 31772459), Opening Foundation of Shaanxi Key Laboratory for Animal Conservation (Northwest University) (AC2019001) and Natural Science Foundation of Shaanxi Province (grant no. 2020JM-100).

## References

- Adams, J. M., Difazio, L. T., Rolandelli, R. H., Luján, J. J., Haskó, G., Csóka, B., Selmeczy, Z. and Németh, Z. H. (2009). HIF-1: a key mediator in hypoxia. *Acta Physiol. Hung.* **96**, 19-28. doi:10.1556/APhysiol.96.2009.1.2
- Austin, S. and St-Pierre, J. (2012). PGC1alpha and mitochondrial metabolism—emerging concepts and relevance in ageing and neurodegenerative disorders. *J. Cell Sci.* **125**, 4963-4971. doi:10.1242/jcs.113662
- Baldelli, S., Aquilano, K. and Ciriolo, M. R. (2013). Punctum on two different transcription factors regulated by PGC-1alpha: nuclear factor erythroid-derived 2-like 2 and nuclear respiratory factor 2. *Biochim. Biophys. Acta* **1830**, 4137-4146. doi:10.1016/j.bbagen.2013.04.006
- Bodine, S. C., Latres, E., Baumhueter, S., Lai, V. K., Nunez, L., Clarke, B. A., Poueymirou, W. T., Panaro, F. J., Na, E., Dharmarajan, K. et al. (2001). Identification of ubiquitin ligases required for skeletal muscle atrophy. *Science* **294**, 1704-1708. doi:10.1126/science.1065874
- Buck, C. L., Barnes, B. M. (2000). Effects of ambient temperature on metabolic rate, respiratory quotient, and torpor in an arctic hibernator. *Am. J. Physiol. Regul. Integr. Comp. Physiol.* **279**, R255-R262. doi:10.1152/ajpregu.2000.279.1.R255
- Buck, M. J., Squire, T. L. and Andrews, M. T. (2002). Coordinate expression of the PDK4 gene: a means of regulating fuel selection in a hibernating mammal. *Physiol. Genomics* **8**, 5-13. doi:10.1152/physiolgenomics.00076.2001
- Canal, M., Romani-Aumedes, J., Martín-Flores, N., Perez-Fernandez, V. and Malagelada, C. (2014). RTP801/REDD1: a stress coping regulator that turns into a troublemaker in neurodegenerative disorders. *Front. Cell Neurosci.* **8**, 313. doi:10.3389/fncel.2014.00313
- Chang, H., Jiang, S., Ma, X., Peng, X., Zhang, J., Wang, Z., Xu, S., Wang, H. and Gao, Y. (2018). Proteomic analysis reveals the distinct energy and protein metabolism characteristics involved in myofiber type conversion and resistance of atrophy in the extensor digitorum longus muscle of hibernating Daurian ground squirrels. *Comp. Biochem. Physiol. Part D Genomics Proteomics* **26**, 20-31. doi:10.1016/j.cbd.2018.02.002
- Chazarin, B., Ziemianin, A., Evans, A. L., Meugnier, E., Loizon, E., Chery, I., Arnemo, J. M., Swenson, J. E., Gauquelin-Koch, G., Simon, C. et al. (2019). Limited oxidative stress favors resistance to skeletal muscle atrophy in hibernating brown bears (*Ursus arctos*). *Antioxidants (Basel)* **8**, 334. doi:10.3390/antiox8090334
- Connaughton, S., Chowdhury, F., Attia, R. R., Song, S., Zhang, Y., Elam, M. B., Cook, G. A. and Park, E. A. (2010). Regulation of pyruvate dehydrogenase kinase isoform 4 (PDK4) gene expression by glucocorticoids and insulin. *Mol. Cell. Endocrinol.* **315**, 159-167. doi:10.1016/j.mce.2009.08.011
- Crewe, C., Schafer, C., Lee, I., Kinter, M. and Szveda, L. I. (2017). Regulation of pyruvate dehydrogenase Kinase 4 in the heart through degradation by the Lon protease in response to mitochondrial substrate availability. *J. Biol. Chem.* **292**, 305-312. doi:10.1074/jbc.M116.754127
- Eijkelenboom, A. and Burgering, B. M. T. (2013). FOXOs: signalling integrators for homeostasis maintenance. *Nat. Rev. Mol. Cell Biol.* **14**, 83-97. doi:10.1038/nrm3507
- Essers, M. A., Weijzen, S., de Vries-Smits, A. M., Saarloos, I., de Ruiter, N. D., Bos, J. L. and Burgering, B. M. (2004). FOXO transcription factor activation by oxidative stress mediated by the small GTPase Ral and JNK. *EMBO J.* **23**, 4802-4812. doi:10.1038/sj.emboj.7600476
- Ferdous, A., Battiprolu, P. K., Ni, Y. G., Rothermel, B. A. and Hill, J. A. (2010). FoxO, autophagy, and cardiac remodeling. *J. Cardiovasc. Transl. Res.* **3**, 355-364. doi:10.1007/s12265-010-9200-z
- Foletta, V. C., White, L. J., Larsen, A. E., Léger, B. and Russell, A. P. (2011). The role and regulation of MAFbx/atrogin-1 and MuRF1 in skeletal muscle atrophy. *PLoS Arch.* **461**, 325-335. doi:10.1007/s00424-010-0919-9
- Furuyama, T., Kitayama, K., Yamashita, H. and Mori, N. (2003). Forkhead transcription factor FOXO1 (FKHR)-dependent induction of PDK4 gene expression in skeletal muscle during energy deprivation. *Biochem. J.* **375**, 365-371. doi:10.1042/bj20030022
- Gao, Y. F., Wang, J., Wang, H.-P., Feng, B., Dang, K., Wang, Q. and Hinghofer-Szalkay, H. G. (2012). Skeletal muscle is protected from disuse in hibernating dauria ground squirrels. *Comp. Biochem. Physiol. A Mol. Integr. Physiol.* **161**, 296-300. doi:10.1016/j.cbpa.2011.11.009
- Gao, Y., Arfat, Y., Wang, H. and Goswami, N. (2018). Muscle atrophy induced by mechanical unloading: mechanisms and potential countermeasures. *Front. Physiol.* **9**, 235. doi:10.3389/fphys.2018.00235
- Gholap, S. G., Badiger, M. V. and Gopinath, C. S. (2005). Molecular origins of wettability of hydrophobic poly(vinylidene fluoride) microporous membranes on poly(vinyl alcohol) adsorption: Surface and interface analysis by XPS. *J. Phys. Chem. B* **109**, 13941-13947. doi:10.1021/jp050806r
- Gilda, J. E. and Gomes, A. V. (2013). Stain-Free total protein staining is a superior loading control to beta-actin for western blots. *Anal. Biochem.* **440**, 186-188. doi:10.1016/j.ab.2013.05.027
- Gurtler, A., Kunz, N., Gomolka, M., Hornhardt, S., Friedl, A. A., McDonald, K., Kohn, J. E. and Posch, A. (2013). Stain-Free technology as a normalization tool in western blot analysis. *Anal. Biochem.* **433**, 105-111. doi:10.1016/j.ab.2012.10.010
- Hershey, J. D., Robbins, C. T., Nelson, O. L. and Lin, D. C. (2008). Minimal seasonal alterations in the skeletal muscle of captive brown bears. *Physiol. Biochem. Zool.* **81**, 138-147. doi:10.1086/524391
- Jiang, S., Guo, S., Xue, W., Wang, H., Goswami, N. and Gao, Y. (2015). Seasonal oxidative capacity of skeletal muscles in hibernating Daurian ground squirrels (*Spermophilus dauricus*). *Can. J. Zool.* **93**, 593-598. doi:10.1139/cjz-2015-0027
- Kurien, B. T. and Scofield, R. H. (2015). Western blotting of high and low molecular weight proteins using heat. *Methods Mol. Biol.* **1312**, 247-255. doi:10.1007/978-1-4939-2694-7\_26
- Kwon, H.-S., Huang, B., Unterman, T. G. and Harris, R. A. (2004). Protein kinase B-alpha inhibits human pyruvate dehydrogenase kinase-4 gene induction by dexamethasone through inactivation of FOXO transcription factors. *Diabetes* **53**, 899-910. doi:10.2337/diabetes.53.4.899
- Ladner, C. L., Yang, J., Turner, R. J. and Edwards, R. A. (2004). Visible fluorescent detection of proteins in polyacrylamide gels without staining. *Anal. Biochem.* **326**, 13-20. doi:10.1016/j.ab.2003.10.047
- Lagrand-Cantaloube, J., Offner, N., Csibi, A., Leibovitch, M. P., Batonnet-Pichon, S., Tintignac, L. A., Segura, C. T. and Leibovitch, S. A. (2008). The initiation factor eIF3-f is a major target for Atrogin1/MAFbx function in skeletal muscle atrophy. *EMBO J.* **27**, 1266-1276. doi:10.1038/emboj.2008.52
- Lohuis, T. D., Harlow, H. J., Beck, T. D. and Iazzo, P. A. (2007). Hibernating bears conserve muscle strength and maintain fatigue resistance. *Physiol. Biochem. Zool.* **80**, 257-269. doi:10.1086/513190
- Ma, Y. L., Zhu, X., Rivera, P. M., Toien, O., Barnes, B. M., LaManna, J. C., Smith, M. A. and Drew, K. L. (2005). Absence of cellular stress in brain after hypoxia induced by arousal from hibernation in Arctic ground squirrels. *Am. J. Physiol. Regul. Integr. Comp. Physiol.* **289**, R1297-R1306. doi:10.1152/ajpregu.00260.2005
- Ma, X., Chang, H., Wang, Z., Xu, S., Peng, X., Zhang, J., Yan, X., Lei, T., Wang, H. and Gao, Y. (2019). Differential activation of the calpain system involved in individualized adaptation of different fast-twitch muscles in hibernating Daurian ground squirrels. *J. Appl. Physiol.* (1985) **127**, 328-341. doi:10.1152/jappphysiol.00124.2019
- McLaughlin, C. N. and Broihier, H. T. (2018). Keeping neurons young and foxy: FoxOs promote neuronal plasticity. *Trends Genet.* **34**, 65-78. doi:10.1016/j.tig.2017.10.002
- Moylan, J. S. and Reid, M. B. (2007). Oxidative stress, chronic disease, and muscle wasting. *Muscle Nerve* **35**, 411-429. doi:10.1002/mus.20743
- Moylan, J. S., Smith, J. D., Chambers, M. A., McLaughlin, T. J. and Reid, M. B. (2008). TNF induction of atrogin-1/MAFbx mRNA depends on Foxo4 expression but not AKT-Foxo1/3 signaling. *Am. J. Physiol. Cell Physiol.* **295**, C986-C993. doi:10.1152/ajpcell.00041.2008
- Mullarky, E. and Cantley, L. C. (2015). Diverting glycolysis to combat oxidative stress. In *Innovative Medicine: Basic Research and Development* (ed. K. Nakao, N. Minato and S. Uemoto), pp. 3-23. Springer.
- Nowell, M. M., Choi, H. and Rourke, B. C. (2011). Muscle plasticity in hibernating ground squirrels (*Spermophilus lateralis*) is induced by seasonal, but not low-temperature, mechanisms. *J. Comp. Physiol. B* **181**, 147-164. doi:10.1007/s00360-010-0505-7
- Ono, A., Ito, A., Sato, T., Yamaguchi, M., Suzuki, T., Kawabe, Y. and Kamihira, M. (2017). Hypoxia-responsive transgene expression system using RTP801 promoter and synthetic transactivator fused with oxygen-dependent degradation domain. *J. Biosci. Bioeng.* **124**, 115-124. doi:10.1016/j.jbiosc.2017.02.012
- Phaniendra, A., Jestadi, D. B. and Periyasamy, L. (2015). Free radicals: properties, sources, targets, and their implication in various diseases. *Indian J. Clin. Biochem.* **30**, 11-26. doi:10.1007/s12291-014-0446-0
- Pomiès, P., Blaquièrre, M., Maury, J., Mercier, J., Gouzi, F. and Hayot, M. (2016). Involvement of the FoxO1/MuRF1/Atrogin-1 signaling pathway in the oxidative stress-induced atrophy of cultured chronic obstructive pulmonary disease myotubes. *PLoS ONE* **11**, e0160092. doi:10.1371/journal.pone.0160092
- Powers, S. K., Smuder, A. J. and Judge, A. R. (2012). Oxidative stress and disuse muscle atrophy: cause or consequence? *Curr. Opin. Clin. Nutr. Metab. Care* **15**, 240-245. doi:10.1097/MCO.0b013e328352b4c2

- Rodda, D. J. and Yamazaki, H. (1994). Poly(Vinyl Alcohol) as a blocking agent in enzyme immunoassays. *Immunol. Investig.* **23**, 421-428. doi:10.3109/08820139409066836
- Rourke, B. C., Qin, A., Haddad, F., Baldwin, K. M. and Caiozzo, V. J. (2004). Cloning and sequencing of myosin heavy chain isoform cDNAs in golden-mantled ground squirrels: effects of hibernation on mRNA expression. *J. Appl. Physiol.* **97**, 1985-1991. doi:10.1152/jappphysiol.00695.2004
- Seifert, E. L., Estey, C., Xuan, J. Y. and Harper, M.-E. (2010). Electron transport chain-dependent and -independent mechanisms of mitochondrial H<sub>2</sub>O<sub>2</sub> emission during long-chain fatty acid oxidation. *J. Biol. Chem.* **285**, 5748-5758. doi:10.1074/jbc.M109.026203
- Shoshani, T., Faerman, A., Mett, I., Zelin, E., Tenne, T., Gorodin, S., Moshel, Y., Elbaz, S., Budanov, A., Chajut, A. et al. (2002). Identification of a novel hypoxia-inducible factor 1-responsive gene, RTP801, involved in apoptosis. *Mol. Cell. Biol.* **22**, 2283-2293. doi:10.1128/MCB.22.7.2283-2293.2002
- Steffen, J. M., Koebel, D. A., Musacchia, X. J. and Milsom, W. K. (1991). Morphometric and metabolic indices of disuse in muscles of hibernating ground squirrels. *Comp. Biochem. Physiol. B* **99**, 815-819. doi:10.1016/0305-0491(91)90147-6
- Vigelsø, A., Dybboe, R., Hansen, C. N., Dela, F., Helge, J. W. and Guadalupe Grau, A. (2015). GAPDH and beta-actin protein decreases with aging, making Stain-Free technology a superior loading control in Western blotting of human skeletal muscle. *J. Appl. Physiol.* **118**, 386-394. doi:10.1152/jappphysiol.00840.2014
- Wang, Z., Jiang, S. F., Cao, J., Liu, K., Xu, S. H., Arfat, Y., Guo, Q. L., Chang, H., Goswami, N., Hinghofer-Szalkay, H. et al. (2019). Novel findings on ultrastructural protection of skeletal muscle fibers during hibernation of Daurian ground squirrels: mitochondria, nuclei, cytoskeleton, glycogen. *J. Cell. Physiol.* **234**, 13318-13331. doi:10.1002/jcp.28008
- Wei, Y., Zhang, J., Yan, X., Peng, X., Xu, S., Chang, H., Wang, H. and Gao, Y. (2019). Remarkable protective effects of Nrf2-mediated antioxidant enzymes and tissue specificity in different skeletal muscles of Daurian ground squirrels over the torpor-arousal cycle. *Front. Physiol.* **10**, 1449. doi:10.3389/fphys.2019.01449
- Wijenayake, S., Tessier, S. N. and Storey, K. B. (2017). Regulation of pyruvate dehydrogenase (PDH) in the hibernating ground squirrel, (*Ictidomys tridecemlineatus*). *J. Therm. Biol.* **69**, 199-205. doi:10.1016/j.jtherbio.2017.07.010
- Xu, R., Andres-Mateos, E., Mejias, R., MacDonald, E. M., Leinwand, L. A., Merriman, D. K., Fink, R. H. A. and Cohn, R. D. (2013). Hibernating squirrel muscle activates the endurance exercise pathway despite prolonged immobilization. *Exp. Neurol.* **247**, 392-401. doi:10.1016/j.expneurol.2013.01.005
- Yang, C.-X., He, Y., Gao, Y.-F., Wang, H.-P. and Goswami, N. (2014). Changes in calpains and calpastatin in the soleus muscle of Daurian ground squirrels during hibernation. *Comp. Biochem. Physiol. A Mol. Integr. Physiol.* **176**, 26-31. doi:10.1016/j.cbpa.2014.05.022
- Yuzefovych, L. V., Musiyenko, S. I., Wilson, G. L. and Rachek, L. I. (2013). Mitochondrial DNA damage and dysfunction, and oxidative stress are associated with endoplasmic reticulum stress, protein degradation and apoptosis in high fat diet-induced insulin resistance mice. *PLoS ONE* **8**, e54059. doi:10.1371/journal.pone.0054059
- Zhang, J., Wei, Y., Qu, T., Wang, Z., Xu, S., Peng, X., Yan, X., Chang, H., Wang, H. and Gao, Y. (2019). Prosurvival roles mediated by the PERK signaling pathway effectively prevent excessive endoplasmic reticulum stress-induced skeletal muscle loss during high-stress conditions of hibernation. *J. Cell. Physiol.* **234**, 19728-19739. doi:10.1002/jcp.28572
